## Correction: (A)Symmetric Stem Cell Replication and Cancer

David Dingli, Arne Traulsen, Franziska Michor

doi: 10.1371/journal.pcbi.0030053

In *PLoS Computational Biology*, volume 3, issue 3:

An author's name was misspelled as Fransizka Michor and should read:

### **Franziska Michor**

This correction note may be found online at doi: 10.1371/journal.pcbi.0030083.

Published April 27, 2007

Citation: (2007) Correction: (A)Symmetric stem cell replication and cancer. *PLoS Comput Biol* 3(4): e83. doi:10.1371/journal.pcbi.0030083

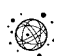

Source: http://www.ploscompbiol.org/article/fetchObject.action;jsessionid=A00FCD5EFFE9AED96BED066C9463281D?uri=info%3Adoi%2F10.1371%2Fjournal.pcbi.0030083&representation=PDF
